# Supplementary material for: Investigation of the In Vivo, In Vitro, and In Silico Wound Healing Potential of Pinctada martensii Purified Peptides
Source: MDPI journal article supplement (doi:10.3390/md20070417), 2022-06-26
Supplement: s1 [file s1]

# Investigation of the *in vivo*, *in vitro* and *in silico* wound healing potential of *Pinctada martensii* purified peptides

Ting Zhang<sup>1, †</sup>, Faming Yang<sup>1,2, †</sup>, Xiaoming Qin<sup>1,3,4,5,6,7,\*</sup>, Xianmei Yang<sup>1</sup>, Chaohua

Zhang<sup>1,3,4,5,6,7</sup>, Zhaoyi Wan<sup>1</sup> and Haisheng Lin<sup>1,3,4,5,6,7</sup>

<sup>1</sup> College of Food Science and Technology, Guangdong Ocean University, Zhanjiang 524088, China; ZhTing95@163.com (T.Z.); yangfm0123@163.com (F.Y.); 13414884976@163.com (X.Y.); Zhangch2@139.com (C.Z.); spring5water@163.com (Z.W.); haishenglin@163.com (H.L.)

<sup>2</sup> Marine College, Shandong University, Weihai, 264209, China

<sup>3</sup> Guangdong Provincial Key Laboratory of Aquatic Product Processing and Safety, Zhanjiang 524088, China

<sup>4</sup> National Research and Development Branch Center for Shellfish Processing (Zhanjiang), Zhanjiang 524088, China

<sup>5</sup> Guangdong Province Engineering Laboratory for Marine Biological Products, Zhanjiang 524088, China

<sup>6</sup> Guangdong Provincial Engineering Technology Research Center of Marine Food, Zhanjiang 524088, China

<sup>7</sup> Collaborative Innovation Center of Seafood Deep Processing, Dalian Polytechnic University, Dalian 116034, China

\* Correspondence: qinxm@gdou.edu.cn; Tel.: +86-0759-2396027 (M.Q.)

† These authors contributed equally to this work.

## Corresponding Author

\*XiaoMing Qin, Ph.D.

College of Food Science and Technology, Guangdong Ocean University, No.1, Haida  
Road, Zhanjiang 524000, China

Tel: +86 0759 2396027

Email: xiaoming0502@21cn.com

## Supplementary Material and Methods

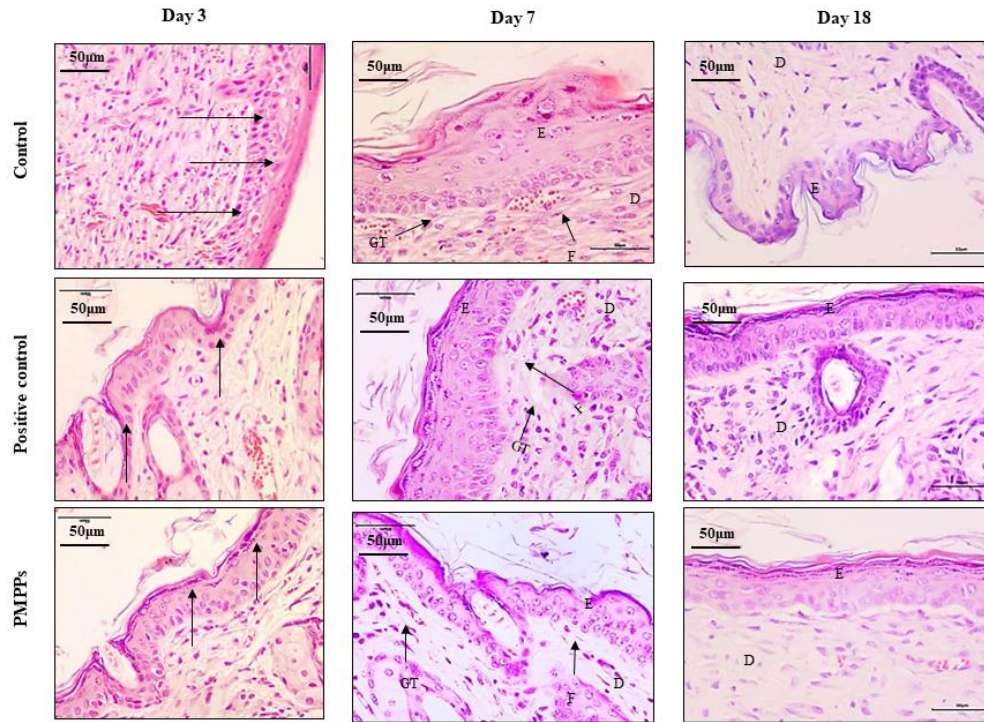

**Figure S1.** H&E stain histological analysis (40 $\times$ ). Note: Black thick arrows indicate inflammatory cell infiltration. Letters D, E, F, and GT represent the dermis layer, the epidermal layer, fibroblasts, and granulation tissue, respectively.

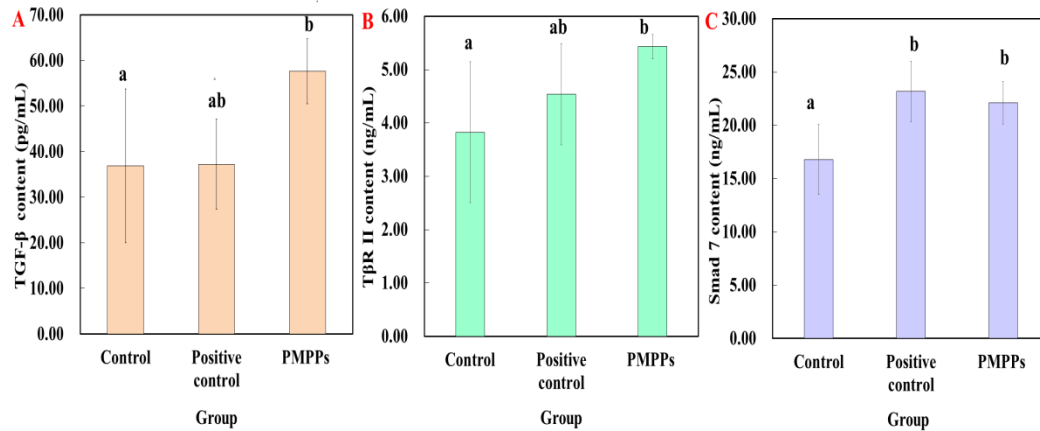

**Figure S2.** Effects of topical administration of PMPPs on TGF- $\beta$ /Smad signaling pathway. (A) Effect of PMPPs on the expression of TGF- $\beta$ . (B) Effect of PMPPs on T $\beta$ RII expression. (C) Effect of PMPPs on Smad 7 expression. Note: Different superscript letters on the same day indicate significant ( $p < 0.05$ ) and non-significant ( $p > 0.05$ ) differences between groups, respectively.

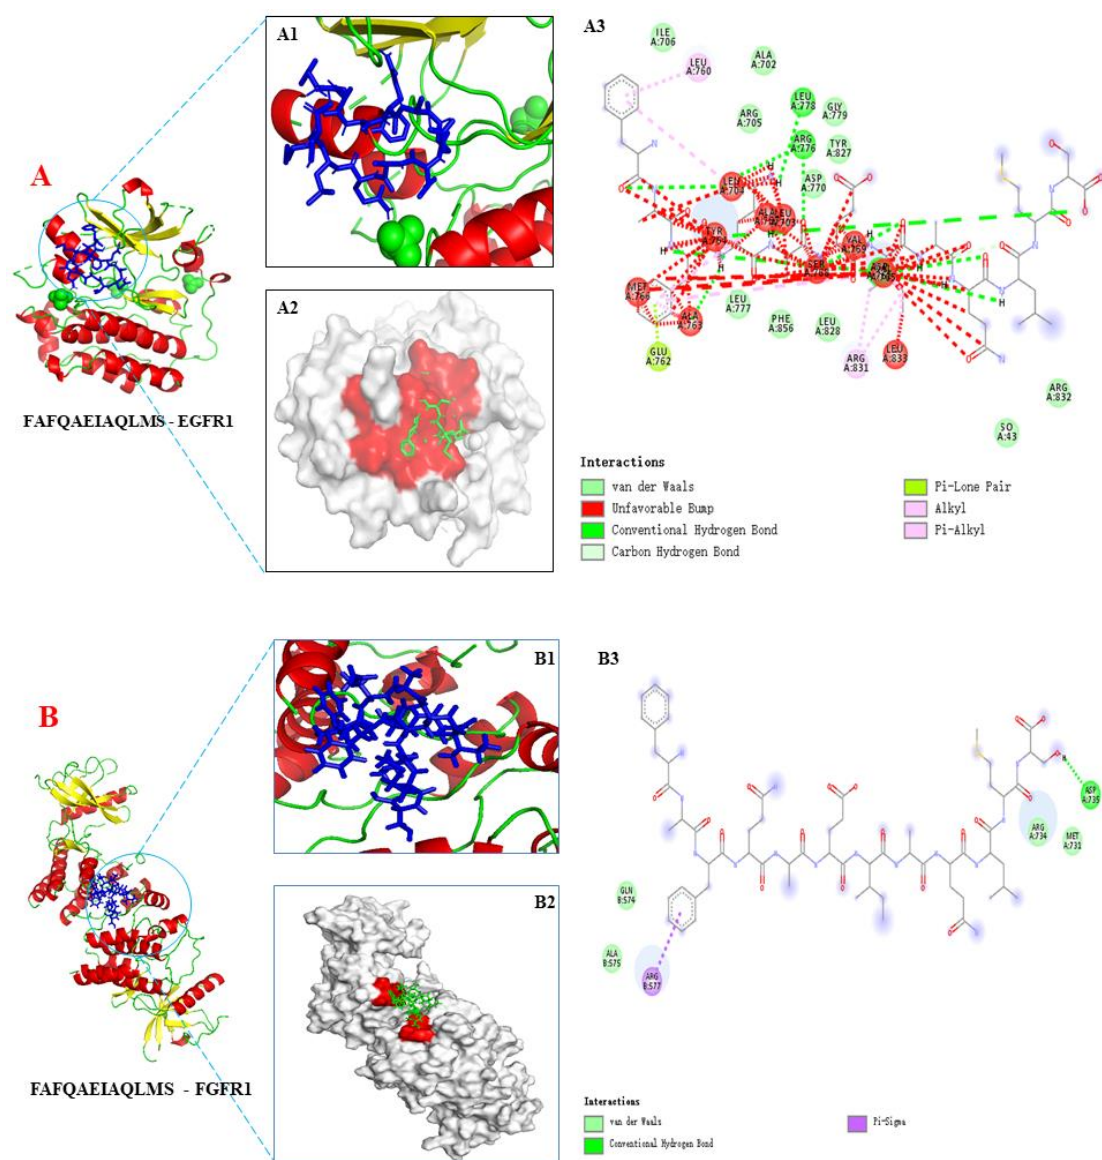

**Figure S3.** Figure 8. The docking results of PMPPs (FAFQAEIAQLMS) with protein receptors EGFR1/FGFR1. (A1-2 and B1-2) 3D structure of PMPPs - EGFR1/FGFR1 and the process of binding interaction between them. (A3 and B3) 2D interaction diagram of PMPPs - EGFR1/FGFR1.
